# Supplementary material for: Elevated expression of LPCAT1 predicts a poor prognosis and is correlated with the tumour microenvironment in endometrial cancer
Source: PubMed Central journal article supplement (PMC8139085; doi:10.1186/s12935-021-01965-1), 2021-05-20

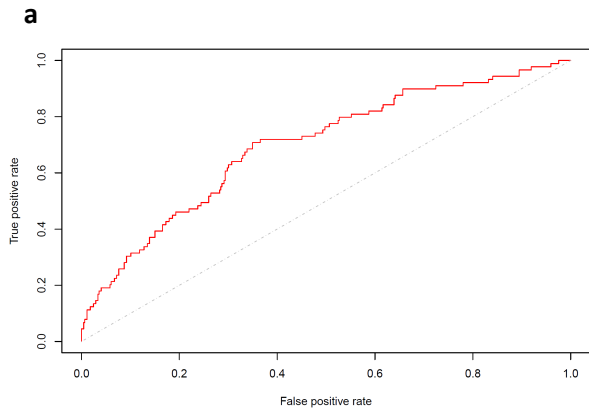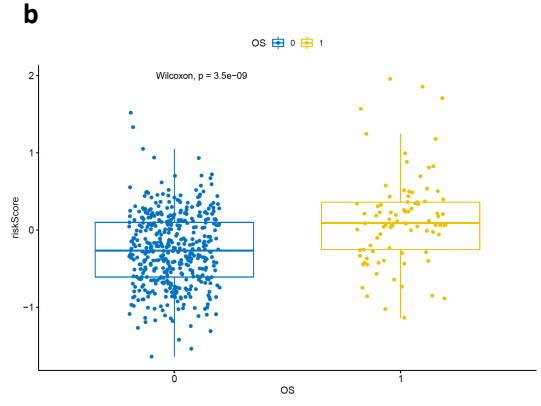

Supplement: 12935_2021_1965_MOESM1_ESM.pdf [file 12935_2021_1965_MOESM1_ESM.pdf]
