# Supplementary material for: Elevated expression of LPCAT1 predicts a poor prognosis and is correlated with the tumour microenvironment in endometrial cancer
Source: Cancer Cell Int. 2021 May 20;21:269. doi: 10.1186/s12935-021-01965-1 (PMC8139085; doi:10.1186/s12935-021-01965-1)
Supplement: Supplementary file 3 — Additional file 3: Table S1. Immune scores and stromal scores of EC. [file 12935_2021_1965_MOESM3_ESM.xlsx]

## Sheet: estimate score
	StromalScore	ImmuneScore	ESTIMATEScore	TumorPurity
TCGA-2E-A9G8-01A	-1491.35	245.715	-1245.63	0.912213
TCGA-4E-A92E-01A	-602.512	838.512	235.999	0.802317
TCGA-5B-A90C-01A	-1065.44	-591.322	-1656.76	0.935263
TCGA-5S-A9Q8-01A	-1093.52	-135.581	-1229.1	0.911216
TCGA-A5-A0G1-01A	-485.102	2492.76	2007.66	0.621854
TCGA-A5-A0G2-01A	-720.33	679.752	-40.5781	0.825882
TCGA-A5-A0G3-01A	-1175.54	-889.908	-2065.45	0.954802
TCGA-A5-A0G5-01A	93.4449	2479.89	2573.34	0.554759
TCGA-A5-A0G9-01A	-985.049	433.428	-551.622	0.865817
TCGA-A5-A0GA-01A	-705.156	116.577	-588.578	0.868519
TCGA-A5-A0GB-01A	-1404.92	-359.328	-1764.25	0.940731
TCGA-A5-A0GD-01A	-1393.22	588.955	-804.262	0.883773
TCGA-A5-A0GE-01A	-209.997	193.077	-16.9198	0.823919
TCGA-A5-A0GG-01A	-183.749	548.712	364.963	0.790875
TCGA-A5-A0GH-01A	-1598.52	-837.35	-2435.87	0.969545
TCGA-A5-A0GI-01A	-927.676	144.704	-782.972	0.882306
TCGA-A5-A0GJ-01A	-237.225	961.605	724.38	0.757502
TCGA-A5-A0GM-01A	-560.46	-188.554	-749.014	0.879949
TCGA-A5-A0GN-01A	-308.558	1358.9	1050.34	0.725411
TCGA-A5-A0GP-01A	-1044.55	-66.0223	-1110.57	0.903912
TCGA-A5-A0GQ-01A	-767.639	1280.02	512.383	0.777448
TCGA-A5-A0GR-01A	-16.5743	1812.57	1796	0.645881
TCGA-A5-A0GU-01A	-816.644	455.002	-361.642	0.851529
TCGA-A5-A0GV-01A	-1605.34	-844.493	-2449.83	0.970045
TCGA-A5-A0GW-01A	247.597	1506.11	1753.71	0.650608
TCGA-A5-A0GX-01A	117.12	800.394	917.515	0.738693
TCGA-A5-A0R6-01A	-409.376	35.4297	-373.946	0.852474
TCGA-A5-A0R7-01A	322.741	883.555	1206.3	0.709465
TCGA-A5-A0R8-01A	-320.519	1156.75	836.229	0.746682
TCGA-A5-A0R9-01A	-299.791	630.409	330.618	0.79395
TCGA-A5-A0RA-01A	-1073.82	265.787	-808.033	0.884032
TCGA-A5-A0VO-01A	-382.533	219.903	-162.631	0.835851
TCGA-A5-A0VP-01A	-1403.33	172.808	-1230.53	0.911302
TCGA-A5-A0VQ-01A	-843.393	395.38	-448.013	0.858107
TCGA-A5-A1OF-01A	-677.526	1721.02	1043.5	0.726102
TCGA-A5-A1OG-01A	-1291.58	518.286	-773.291	0.881637
TCGA-A5-A1OH-01A	-511.113	-1366.54	-1877.65	0.946246
TCGA-A5-A1OJ-01A	737.81	1186.94	1924.75	0.631338
TCGA-A5-A1OK-01A	-516.579	172.727	-343.852	0.850157
TCGA-A5-A2K2-01A	-1797.37	-542.471	-2339.84	0.965997
TCGA-A5-A2K3-01A	249.791	3179.4	3429.19	0.446137
TCGA-A5-A2K4-01A	-549.084	-67.3496	-616.433	0.870538
TCGA-A5-A2K5-01A	-677.271	603.631	-73.64	0.828609
TCGA-A5-A2K7-01A	-721.354	162.408	-558.946	0.866354
TCGA-A5-A3LO-01A	-1126.4	-273.686	-1400.09	0.921267
TCGA-A5-A3LP-01A	-1062.33	251.248	-811.078	0.884241
TCGA-A5-A7WJ-01A	-2116.01	-865.158	-2981.17	0.986024
TCGA-A5-A7WK-01A	-1203.14	-479.258	-1682.4	0.936589
TCGA-A5-AB3J-01A	387.51	659.705	1047.21	0.725727
TCGA-AJ-A23M-01A	-816.714	-300.443	-1117.16	0.904325
TCGA-AJ-A23N-01A	279.61	454.531	734.141	0.756566
TCGA-AJ-A23O-01A	-336.307	1202.22	865.912	0.743777
TCGA-AJ-A2QK-01A	-156.582	1334.27	1177.69	0.712418
TCGA-AJ-A2QL-01A	-732.159	997.765	265.606	0.799716
TCGA-AJ-A2QM-01A	-1351.76	-921.342	-2273.1	0.963417
TCGA-AJ-A2QN-01A	-746.365	-424.667	-1171.03	0.907672
TCGA-AJ-A2QO-01A	-1174.91	-173.393	-1348.3	0.918284
TCGA-AJ-A3BD-01A	-1117.64	742.189	-375.453	0.85259
TCGA-AJ-A3BF-01A	-1114.63	-421.2	-1535.83	0.928833
TCGA-AJ-A3BG-01A	-1618.98	-169.747	-1788.73	0.941944
TCGA-AJ-A3BI-01A	-810.877	1028.24	217.365	0.803947
TCGA-AJ-A3BK-01A	-707.587	1133.93	426.346	0.785328
TCGA-AJ-A3EJ-01A	-41.8883	491.946	450.058	0.783169
TCGA-AJ-A3EK-01A	-242.977	882.354	639.377	0.765589
TCGA-AJ-A3EL-01A	-300.505	864.544	564.039	0.772656
TCGA-AJ-A3EM-01A	-1196.26	-1301.53	-2497.79	0.971731
TCGA-AJ-A3I9-01A	-1223.87	-620.364	-1844.23	0.944648
TCGA-AJ-A3IA-01A	207.548	615.066	822.614	0.74801
TCGA-AJ-A3NC-01A	-1174.22	49.1672	-1125.05	0.904818
TCGA-AJ-A3NE-01A	-857.743	534.445	-323.298	0.848564
TCGA-AJ-A3NF-01A	514.468	1027.05	1541.52	0.673942
TCGA-AJ-A3NG-01A	-1021.56	-1022.3	-2043.85	0.953855
TCGA-AJ-A3NH-01A	-1068.61	-938.494	-2007.1	0.952221
TCGA-AJ-A3OJ-01A	-486.083	645.746	159.663	0.808955
TCGA-AJ-A3OK-01A	776.822	1370.24	2147.07	0.6057
TCGA-AJ-A3OL-01A	-1688.5	-1174.33	-2862.83	0.982981
TCGA-AJ-A3QS-01A	-884.357	920.037	35.6803	0.819519
TCGA-AJ-A3TW-01A	-856.973	1519.06	662.083	0.76344
TCGA-AJ-A5DV-01A	-1246.13	591.3	-654.834	0.873298
TCGA-AJ-A5DW-01A	-610.031	-269.782	-879.813	0.888908
TCGA-AJ-A8CT-01A	-133.721	1754.74	1621.02	0.665275
TCGA-AJ-A8CV-01A	-744.308	817.598	73.2897	0.816343
TCGA-AJ-A8CW-01A	-830.729	147.996	-682.733	0.875286
TCGA-AP-A051-01A	-882.87	239.281	-643.589	0.872493
TCGA-AP-A052-01A	-460.33	264.022	-196.308	0.838555
TCGA-AP-A053-01A	-1213.08	-637.4	-1850.48	0.944949
TCGA-AP-A054-01A	-1527.84	-950.204	-2478.05	0.971043
TCGA-AP-A056-01A	213.542	652.212	865.754	0.743793
TCGA-AP-A059-01A	-317.202	2047.87	1730.67	0.653173
TCGA-AP-A05A-01A	-1252.47	-865.693	-2118.16	0.957073
TCGA-AP-A05D-01A	-408.378	1256.05	847.67	0.745564
TCGA-AP-A05H-01A	-509.613	-705.937	-1215.55	0.910395
TCGA-AP-A05J-01A	-1225.04	-686.247	-1911.29	0.947832
TCGA-AP-A05N-01A	-557.661	-444.268	-1001.93	0.896976
TCGA-AP-A05O-01A	-1013.98	719.87	-294.106	0.846289
TCGA-AP-A05P-01A	-493.041	227.316	-265.725	0.844062
TCGA-AP-A0L8-01A	-905.295	-1096.05	-2001.35	0.951963
TCGA-AP-A0L9-01A	-1527.54	-394.32	-1921.86	0.948325
TCGA-AP-A0LD-01A	-852.217	-391.659	-1243.88	0.912107
TCGA-AP-A0LE-01A	-1010.2	-52.97	-1063.17	0.900914
TCGA-AP-A0LF-01A	-969.201	2039.54	1070.34	0.723388
TCGA-AP-A0LG-01A	-1538.98	-538.387	-2077.36	0.95532
TCGA-AP-A0LH-01A	-1315.64	1.01191	-1314.63	0.916316
TCGA-AP-A0LI-01A	-337.785	1693.18	1355.4	0.693872
TCGA-AP-A0LJ-01A	-601.193	884.488	283.295	0.798154
TCGA-AP-A0LL-01A	-660.387	256.631	-403.756	0.854754
TCGA-AP-A0LM-01A	590.776	1512.03	2102.81	0.610856
TCGA-AP-A0LN-01A	-1029.73	267.834	-761.893	0.880846
TCGA-AP-A0LO-01A	-885.218	-148.97	-1034.19	0.899059
TCGA-AP-A0LP-01A	-852.173	853.027	0.854357	0.822438
TCGA-AP-A0LS-01A	-933.846	-115.053	-1048.9	0.900003
TCGA-AP-A0LT-01A	-1731.9	-349.489	-2081.39	0.955495
TCGA-AP-A0LV-01A	-365.984	178.515	-187.469	0.837847
TCGA-AP-A1DH-01A	-638.483	1221.84	583.356	0.770853
TCGA-AP-A1DK-01A	-488.227	1060.56	572.335	0.771883
TCGA-AP-A1DM-01A	-979.034	-228.956	-1207.99	0.909935
TCGA-AP-A1DO-01A	-2241.59	-412.527	-2654.12	0.976892
TCGA-AP-A1DP-01A	-1505.2	-292.708	-1797.91	0.942396
TCGA-AP-A1DQ-01A	-837.736	-120.899	-958.635	0.894148
TCGA-AP-A1DR-01A	-1244.73	-111.772	-1356.5	0.91876
TCGA-AP-A1DV-01A	-1498.23	-245.865	-1744.09	0.939724
TCGA-AP-A1E0-01A	-573.201	-203.216	-776.417	0.881853
TCGA-AP-A1E1-01A	-1302.17	247.941	-1054.23	0.900343
TCGA-AP-A1E3-01A	156.505	-110.625	45.8795	0.81866
TCGA-AP-A1E4-01A	-976.098	-1158.76	-2134.86	0.957781
TCGA-AP-A3K1-01A	-728.093	-213.576	-941.669	0.89303
TCGA-AP-A5FX-01A	-1146.38	527.367	-619.015	0.870724
TCGA-AW-A1PO-01A	-1390.67	-871.891	-2262.56	0.963002
TCGA-AX-A05S-01A	-451.223	715.608	264.385	0.799823
TCGA-AX-A05T-01A	-769.415	32.0206	-737.395	0.879138
TCGA-AX-A05U-01A	-821.519	-579.738	-1401.26	0.921334
TCGA-AX-A05W-01A	-1022.57	1103.04	80.4714	0.815734
TCGA-AX-A05Y-01A	-1420.43	-494.576	-1915.01	0.948006
TCGA-AX-A05Z-01A	-306.185	1860.09	1553.9	0.672598
TCGA-AX-A060-01A	-1633.24	-582.754	-2215.99	0.961137
TCGA-AX-A062-01A	-868.13	-584.314	-1452.44	0.924229
TCGA-AX-A063-01A	-306.645	1584.06	1277.41	0.70207
TCGA-AX-A064-01A	-809.592	32.103	-777.489	0.881927
TCGA-AX-A06B-01A	-103.142	461.209	358.067	0.791494
TCGA-AX-A06D-01A	-1735.71	-173.57	-1909.28	0.947738
TCGA-AX-A06F-01A	-551.432	1077.24	525.808	0.776207
TCGA-AX-A06H-01A	244.16	2073.36	2317.52	0.585604
TCGA-AX-A06J-01A	-1836.78	544.055	-1292.72	0.915023
TCGA-AX-A06L-01A	-144.506	1040.67	896.163	0.740802
TCGA-AX-A0IS-01A	-772.509	-96.5538	-869.063	0.888184
TCGA-AX-A0IU-01A	-1190.25	-448.541	-1638.79	0.934326
TCGA-AX-A0IW-01A	-1041.34	-160.921	-1202.26	0.909586
TCGA-AX-A0IZ-01A	-196.844	1351.08	1154.23	0.71483
TCGA-AX-A0J0-01A	-1146.38	-365.051	-1511.43	0.9275
TCGA-AX-A0J1-01A	-970.175	315.481	-654.694	0.873288
TCGA-AX-A1C4-01A	-1686.74	-1216.16	-2902.9	0.984044
TCGA-AX-A1C5-01A	-1195.94	-413.792	-1609.73	0.932797
TCGA-AX-A1C7-01A	-1099.13	-388.642	-1487.77	0.926197
TCGA-AX-A1C8-01A	-1141.96	-727.552	-1869.52	0.945859
TCGA-AX-A1C9-01A	-816.445	506.433	-310.012	0.847531
TCGA-AX-A1CA-01A	-1185.93	189.944	-995.986	0.89659
TCGA-AX-A1CC-01A	862.401	1474.17	2336.57	0.583334
TCGA-AX-A1CE-01A	-1474.52	-464.829	-1939.35	0.949137
TCGA-AX-A1CF-01A	-1148.32	-288.536	-1436.85	0.923353
TCGA-AX-A1CI-01A	-1560.15	-310.221	-1870.38	0.9459
TCGA-AX-A1CJ-01A	-940.093	885.711	-54.3815	0.827023
TCGA-AX-A1CK-01A	-1328.19	-961.274	-2289.47	0.964058
TCGA-AX-A1CN-01A	-962.236	-849.814	-1812.05	0.943088
TCGA-AX-A1CP-01A	-722.174	-53.404	-775.578	0.881795
TCGA-AX-A1CR-01A	-867.052	431.305	-435.747	0.857181
TCGA-AX-A2H2-01A	-1094.96	750.406	-344.556	0.850211
TCGA-AX-A2H4-01A	-85.033	2174.62	2089.59	0.612391
TCGA-AX-A2H5-01A	-1566.36	-262.002	-1828.36	0.943882
TCGA-AX-A2H7-01A	-1297.94	-365.618	-1663.56	0.935616
TCGA-AX-A2H8-01A	-1149.62	29.3513	-1120.27	0.90452
TCGA-AX-A2HA-01A	-1252.44	281.76	-970.679	0.894939
TCGA-AX-A2HC-01A	-1326.42	-938.687	-2265.11	0.963102
TCGA-AX-A2HD-01A	-1223.61	-115.115	-1338.72	0.917726
TCGA-AX-A2HF-01A	-1480.83	50.4893	-1430.34	0.922985
TCGA-AX-A2HG-01A	-915.626	522.566	-393.059	0.853938
TCGA-AX-A2HH-01A	-1642.23	-1298.19	-2940.42	0.985009
TCGA-AX-A2HJ-01A	-14.9339	86.9261	71.9922	0.816453
TCGA-AX-A2HK-01A	-1040.99	-676.204	-1717.2	0.938367
TCGA-AX-A2IN-01A	194.815	529.141	723.957	0.757543
TCGA-AX-A2IO-01A	-344.786	-37.8667	-382.653	0.853142
TCGA-AX-A3FS-01A	-751.147	-78.0488	-829.196	0.88548
TCGA-AX-A3FT-01A	-457.999	1918.86	1460.86	0.682642
TCGA-AX-A3FV-01A	-1702.7	-364.527	-2067.23	0.95488
TCGA-AX-A3FW-01A	-1606.79	-655.973	-2262.76	0.96301
TCGA-AX-A3FX-01A	-675.403	306.409	-368.994	0.852094
TCGA-AX-A3FZ-01A	-911.262	-1096.88	-2008.14	0.952268
TCGA-AX-A3G1-01A	-836.846	1106.93	270.084	0.799321
TCGA-AX-A3G3-01A	-301.007	1680.52	1379.51	0.691319
TCGA-AX-A3G4-01A	-22.5855	-584.152	-606.737	0.869837
TCGA-AX-A3G6-01A	-1548.87	201.101	-1347.77	0.918253
TCGA-AX-A3G7-01A	-800.689	649.397	-151.292	0.834936
TCGA-AX-A3G8-01A	-1650.63	-473.875	-2124.5	0.957343
TCGA-AX-A3G9-01A	-1516.74	-916.293	-2433.03	0.969443
TCGA-AX-A3GB-01A	-531.798	694.427	162.629	0.808699
TCGA-AX-A3GI-01A	-1836.45	-985.872	-2822.32	0.981871
TCGA-B5-A0JN-01A	-1283.15	-827.355	-2110.51	0.956747
TCGA-B5-A0JR-01A	-650.686	502.47	-148.216	0.834688
TCGA-B5-A0JS-01A	-405.756	1064.76	659.003	0.763732
TCGA-B5-A0JT-01A	-864.436	-22.4958	-886.932	0.889386
TCGA-B5-A0JV-01A	-1324.06	-435.459	-1759.52	0.940496
TCGA-B5-A0JX-01A	-446.608	828.671	382.063	0.789336
TCGA-B5-A0JY-01A	-243.984	301.266	57.2815	0.817698
TCGA-B5-A0JZ-01A	-268.933	1705.12	1436.19	0.685284
TCGA-B5-A0K0-01A	-21.4795	1161.95	1140.47	0.716242
TCGA-B5-A0K1-01A	-1397.38	-555.31	-1952.69	0.949752
TCGA-B5-A0K2-01A	-78.4657	1787.05	1708.58	0.655624
TCGA-B5-A0K3-01A	-1379.29	103.35	-1275.94	0.914027
TCGA-B5-A0K4-01A	-1199.07	-269.256	-1468.32	0.925116
TCGA-B5-A0K6-01A	-674.988	854.602	179.613	0.80723
TCGA-B5-A0K7-01A	-692.103	1029.57	337.471	0.793338
TCGA-B5-A0K8-01A	-918.503	267.069	-651.434	0.873055
TCGA-B5-A0K9-01A	-957.511	540.049	-417.463	0.855796
TCGA-B5-A11E-01A	-1140.95	-324.816	-1465.77	0.924974
TCGA-B5-A11F-01A	-777.86	-330.536	-1108.4	0.903775
TCGA-B5-A11G-01A	-806.11	562.55	-243.56	0.842313
TCGA-B5-A11H-01A	-398.913	1069.65	670.74	0.762619
TCGA-B5-A11I-01A	-626.077	1485.21	859.131	0.744442
TCGA-B5-A11J-01A	-1062.44	148.073	-914.371	0.89122
TCGA-B5-A11M-01A	441.767	42.0241	483.791	0.78008
TCGA-B5-A11N-01A	-92.4173	2095.14	2002.72	0.622422
TCGA-B5-A11O-01A	-46.8277	797.361	750.534	0.75499
TCGA-B5-A11Q-01A	-1788.83	-991.224	-2780.06	0.980676
TCGA-B5-A11R-01A	-1175	96.5793	-1078.42	0.901883
TCGA-B5-A11S-01A	-573.677	92.3283	-481.349	0.86061
TCGA-B5-A11U-01A	726.268	262.428	988.697	0.731609
TCGA-B5-A11V-01A	-900.86	-355.663	-1256.52	0.912867
TCGA-B5-A11W-01A	-588.612	46.0558	-542.556	0.86515
TCGA-B5-A11X-01A	83.7254	1146.54	1230.27	0.706981
TCGA-B5-A11Y-01A	-610.61	1616.08	1005.47	0.729929
TCGA-B5-A11Z-01A	-1195.24	-488.635	-1683.87	0.936665
TCGA-B5-A121-01A	-944.309	-149.13	-1093.44	0.902833
TCGA-B5-A1MR-01A	-125.248	2499.76	2374.51	0.578801
TCGA-B5-A1MU-01A	592.655	1280.93	1873.59	0.637145
TCGA-B5-A1MV-01A	-775.365	228.781	-546.583	0.865447
TCGA-B5-A1MW-01A	-1519.78	-929.648	-2449.43	0.970031
TCGA-B5-A1MX-01A	-584.398	557.869	-26.5292	0.824718
TCGA-B5-A1MY-01A	-279.941	-319.5	-599.441	0.869308
TCGA-B5-A1MZ-01A	-426.217	709.288	283.071	0.798174
TCGA-B5-A1N2-01A	-446.73	2.32751	-444.403	0.857835
TCGA-B5-A3F9-01A	-616.179	355.56	-260.62	0.84366
TCGA-B5-A3FA-01A	-1224.18	-101.164	-1325.34	0.916944
TCGA-B5-A3FB-01A	-1433.38	25.9987	-1407.38	0.921683
TCGA-B5-A3FC-01A	-95.1754	1250.38	1155.2	0.71473
TCGA-B5-A3FD-01A	-686.703	-160.894	-847.597	0.886732
TCGA-B5-A3FH-01A	-1253.85	146.39	-1107.46	0.903716
TCGA-B5-A3S1-01A	-895.417	100.863	-794.554	0.883105
TCGA-B5-A5OC-01A	346.313	1682.1	2028.41	0.619466
TCGA-B5-A5OD-01A	-791.394	856.833	65.4392	0.817008
TCGA-B5-A5OE-01A	-1368.32	-481.041	-1849.36	0.944895
TCGA-BG-A0LW-01A	-1305.36	68.0458	-1237.32	0.911712
TCGA-BG-A0LX-01A	-183.284	357.532	174.248	0.807695
TCGA-BG-A0M0-01A	-1215.52	-799.309	-2014.83	0.952567
TCGA-BG-A0M2-01A	-1034.04	251.31	-782.734	0.88229
TCGA-BG-A0M3-01A	-1360.67	-224.173	-1584.85	0.931475
TCGA-BG-A0M4-01A	-571.13	267.01	-304.119	0.847071
TCGA-BG-A0M6-01A	-994.747	-1385.13	-2379.87	0.967499
TCGA-BG-A0M7-01A	-578.155	676.866	98.711	0.814182
TCGA-BG-A0M8-01A	758.786	2113.27	2872.06	0.517755
TCGA-BG-A0M9-01A	-931.643	-247.992	-1179.63	0.908201
TCGA-BG-A0MA-01A	-487.823	-138.45	-626.273	0.871248
TCGA-BG-A0MC-01A	-336.539	1153.51	816.97	0.74856
TCGA-BG-A0MG-01A	-1262.1	318.879	-943.226	0.893133
TCGA-BG-A0MH-01A	396.296	1279.59	1675.89	0.65924
TCGA-BG-A0MI-01A	-932.621	403.286	-529.335	0.864175
TCGA-BG-A0MK-01A	-621.58	107.21	-514.37	0.863068
TCGA-BG-A0MO-01A	-1335.25	749.849	-585.399	0.868287
TCGA-BG-A0MQ-01A	-1320.52	-530.672	-1851.19	0.944983
TCGA-BG-A0MS-01A	-783.653	275.563	-508.09	0.862602
TCGA-BG-A0MT-01A	-489.967	537.535	47.5677	0.818518
TCGA-BG-A0MU-01A	-973.277	836.992	-136.285	0.833722
TCGA-BG-A0RY-01A	-962.116	437.551	-524.565	0.863823
TCGA-BG-A0VT-01A	-239.343	203.68	-35.6629	0.825475
TCGA-BG-A0VV-01A	-763.707	385.309	-378.397	0.852816
TCGA-BG-A0VW-01A	-498.72	941.459	442.739	0.783836
TCGA-BG-A0VX-01A	-434.241	1065.57	631.332	0.766348
TCGA-BG-A0VZ-01A	-594.773	676.384	81.6111	0.815637
TCGA-BG-A0W1-01A	-1109.93	75.4613	-1034.47	0.899077
TCGA-BG-A0W2-01A	-469.278	321.548	-147.73	0.834648
TCGA-BG-A0YU-01A	-872.845	-456.695	-1329.54	0.91719
TCGA-BG-A0YV-01A	-1067.73	-626.543	-1694.27	0.937198
TCGA-BG-A186-01A	-582.853	305.647	-277.206	0.844965
TCGA-BG-A187-01A	-665.588	178.026	-487.562	0.861074
TCGA-BG-A18A-01A	45.3276	427.026	472.354	0.78113
TCGA-BG-A18B-01A	-971.165	691.559	-279.606	0.845153
TCGA-BG-A18C-01A	-1150	40.3975	-1109.6	0.903851
TCGA-BG-A220-01A	-1558.08	-973.248	-2531.32	0.972881
TCGA-BG-A221-01A	-470.635	1091.93	621.291	0.767294
TCGA-BG-A222-01A	-1243.37	91.8604	-1151.51	0.906466
TCGA-BG-A2AD-01A	-991.212	-1320.22	-2311.43	0.96491
TCGA-BG-A2AE-01A	-1000.61	890.198	-110.408	0.831618
TCGA-BG-A2L7-01A	-351.964	1039.86	687.898	0.760987
TCGA-BG-A3EW-01A	-1210.45	-468.858	-1679.31	0.93643
TCGA-BG-A3PP-01A	-290.478	-455.673	-746.15	0.87975
TCGA-BK-A0C9-01A	-613.055	754.825	141.77	0.810496
TCGA-BK-A0CA-01A	-1181.8	103.683	-1078.12	0.901864
TCGA-BK-A0CB-01A	499.495	624.824	1124.32	0.717894
TCGA-BK-A0CC-01A	-936.522	-463.628	-1400.15	0.921271
TCGA-BK-A139-01A	-675.841	1154.52	478.678	0.78055
TCGA-BK-A13B-01A	-1118.65	301.698	-816.953	0.884643
TCGA-BK-A13C-01A	-1153.74	-295.892	-1449.63	0.924071
TCGA-BK-A26L-01A	131.835	134.547	266.382	0.799647
TCGA-BK-A4ZD-01A	-1104.86	-1089.41	-2194.26	0.960251
TCGA-BK-A56F-01A	-336.637	99.0131	-237.624	0.841843
TCGA-BK-A6W3-01A	-705.552	916.331	210.779	0.804521
TCGA-BK-A6W4-01A	-120.555	17.3635	-103.192	0.83103
TCGA-BS-A0T9-01A	-505.445	593.535	88.0896	0.815087
TCGA-BS-A0TA-01A	-195.292	2501.33	2306.04	0.586968
TCGA-BS-A0TC-01A	-1306.45	156.393	-1150.06	0.906376
TCGA-BS-A0TD-01A	-950.028	285.919	-664.109	0.87396
TCGA-BS-A0TE-01A	-1063.33	225.188	-838.141	0.886089
TCGA-BS-A0TG-01A	197.923	882.484	1080.41	0.722366
TCGA-BS-A0TI-01A	-372.525	989.554	617.028	0.767695
TCGA-BS-A0TJ-01A	-611.098	-77.7204	-688.819	0.875717
TCGA-BS-A0U5-01A	-1015.61	-421.234	-1436.84	0.923352
TCGA-BS-A0U7-01A	-209.071	745.948	536.877	0.775181
TCGA-BS-A0U8-01A	-729.044	-191.4	-920.444	0.891624
TCGA-BS-A0UA-01A	-35.4797	1187.89	1152.41	0.715017
TCGA-BS-A0UF-01A	-506.572	1297.71	791.139	0.751069
TCGA-BS-A0UJ-01A	-927.401	750.056	-177.345	0.837035
TCGA-BS-A0UL-01A	504.172	1402.94	1907.11	0.633344
TCGA-BS-A0UM-01A	-998.128	1492.7	494.573	0.779089
TCGA-BS-A0UT-01A	-570.99	-436.175	-1007.16	0.897315
TCGA-BS-A0UV-01A	-1007.34	-4.2385	-1011.58	0.897601
TCGA-BS-A0V4-01A	-632.402	385.816	-246.586	0.842553
TCGA-BS-A0V6-01A	-861.514	743.528	-117.986	0.832236
TCGA-BS-A0V7-01A	574.718	1726.42	2301.13	0.587551
TCGA-BS-A0V8-01A	-460.316	494.771	34.4554	0.819622
TCGA-BS-A0VI-01A	-141.146	23.4171	-117.729	0.832215
TCGA-BS-A0WQ-01A	-1398.98	-469.046	-1868.02	0.945788
TCGA-D1-A0ZN-01A	-399.535	256.562	-142.973	0.834264
TCGA-D1-A0ZO-01A	-81.349	554.85	473.501	0.781024
TCGA-D1-A0ZP-01A	-786.784	-642.222	-1429.01	0.92291
TCGA-D1-A0ZQ-01A	69.7494	-116.551	-46.8011	0.826397
TCGA-D1-A0ZR-01A	-1321.51	-517.615	-1839.13	0.944402
TCGA-D1-A0ZS-01A	-821.425	-362.956	-1184.38	0.908493
TCGA-D1-A0ZU-01A	-724.658	-643.843	-1368.5	0.919454
TCGA-D1-A0ZV-01A	-307.959	1440.8	1132.84	0.717022
TCGA-D1-A0ZZ-01A	-1503.33	-1190.33	-2693.65	0.978116
TCGA-D1-A101-01A	297.67	1389.01	1686.68	0.658048
TCGA-D1-A102-01A	-390.057	447.107	57.0499	0.817718
TCGA-D1-A103-01A	-675.756	437.952	-237.804	0.841858
TCGA-D1-A15V-01A	-1077.6	-52.6041	-1130.21	0.905141
TCGA-D1-A15W-01A	-689.192	533.027	-156.165	0.83533
TCGA-D1-A15X-01A	-1363.28	1232.53	-130.75	0.833273
TCGA-D1-A15Z-01A	-1191.63	-261.881	-1453.51	0.924289
TCGA-D1-A160-01A	-635.118	951.363	316.245	0.795231
TCGA-D1-A161-01A	-1131.46	100.314	-1031.14	0.898863
TCGA-D1-A162-01A	-1060.35	16.3089	-1044.04	0.899692
TCGA-D1-A163-01A	-460.616	328.243	-132.373	0.833405
TCGA-D1-A165-01A	-706.476	-463.23	-1169.71	0.90759
TCGA-D1-A167-01A	-1638.89	-799.541	-2438.43	0.969637
TCGA-D1-A168-01A	-71.6186	-267.273	-338.892	0.849773
TCGA-D1-A169-01A	41.2604	1260.18	1301.44	0.699554
TCGA-D1-A16B-01A	-485.17	574.921	89.7515	0.814945
TCGA-D1-A16D-01A	-574.609	680.553	105.944	0.813565
TCGA-D1-A16E-01A	-682.219	586.589	-95.63	0.830412
TCGA-D1-A16F-01A	-506.936	376.203	-130.734	0.833272
TCGA-D1-A16G-01A	-1634.5	207.768	-1426.73	0.922781
TCGA-D1-A16I-01A	-566.824	112.179	-454.645	0.858607
TCGA-D1-A16J-01A	-735.377	1109.65	374.276	0.790037
TCGA-D1-A16N-01A	-640.576	227.261	-413.314	0.855481
TCGA-D1-A16O-01A	-739.089	-600.915	-1340	0.917801
TCGA-D1-A16Q-01A	-324.249	860.138	535.889	0.775273
TCGA-D1-A16R-01A	-282.83	673.016	390.187	0.788603
TCGA-D1-A16S-01A	-720.525	-381.843	-1102.37	0.903396
TCGA-D1-A16V-01A	-921.621	622.836	-298.785	0.846655
TCGA-D1-A16X-01A	-523.158	1451.82	928.666	0.737588
TCGA-D1-A16Y-01A	-991.57	-497.415	-1488.99	0.926264
TCGA-D1-A174-01A	-13.8179	1663.51	1649.69	0.662127
TCGA-D1-A175-01A	-1117.48	-621.27	-1738.75	0.939455
TCGA-D1-A176-01A	-1200.97	133.662	-1067.31	0.901177
TCGA-D1-A177-01A	-1537.01	-1087.45	-2624.46	0.975953
TCGA-D1-A179-01A	-1251.24	-664.517	-1915.76	0.948041
TCGA-D1-A17A-01A	-561.284	328.452	-232.833	0.841464
TCGA-D1-A17B-01A	312.124	1926.87	2238.99	0.594908
TCGA-D1-A17C-01A	456.078	753.505	1209.58	0.709125
TCGA-D1-A17D-01A	-710.343	896.247	185.904	0.806685
TCGA-D1-A17F-01A	-1026.89	981.731	-45.1589	0.826261
TCGA-D1-A17H-01A	-2.35939	537.154	534.795	0.775374
TCGA-D1-A17K-01A	-1558.72	-83.0522	-1641.77	0.934482
TCGA-D1-A17L-01A	-899.26	1104.53	205.274	0.805001
TCGA-D1-A17M-01A	-1009.46	150.479	-858.978	0.887503
TCGA-D1-A17N-01A	134.577	1261.08	1395.66	0.689604
TCGA-D1-A17Q-01A	-751.674	-591.753	-1343.43	0.918
TCGA-D1-A17R-01A	-553.857	-137.026	-690.883	0.875864
TCGA-D1-A17S-01A	-1200.49	-88.9755	-1289.46	0.91483
TCGA-D1-A17T-01A	-1185.53	470.72	-714.811	0.877553
TCGA-D1-A17U-01A	-665.138	242.331	-422.807	0.856202
TCGA-D1-A1NS-01A	-1207.89	220.04	-987.848	0.89606
TCGA-D1-A1NU-01A	-1087.78	210.845	-876.939	0.888714
TCGA-D1-A1NW-01A	-1015.11	218.651	-796.46	0.883237
TCGA-D1-A1NX-01A	-1057.47	-171.671	-1229.15	0.911219
TCGA-D1-A1NY-01A	-503.499	47.6001	-455.899	0.858701
TCGA-D1-A1NZ-01A	-1058.17	509.659	-548.516	0.865589
TCGA-D1-A1O0-01A	-1306.87	-506.208	-1813.07	0.943138
TCGA-D1-A1O5-01A	-831.585	152.158	-679.427	0.875051
TCGA-D1-A1O7-01A	-1404.45	10.3687	-1394.09	0.920924
TCGA-D1-A1O8-01A	-65.4063	2019.71	1954.3	0.627968
TCGA-D1-A2G0-01A	-1577.11	443.796	-1133.32	0.905335
TCGA-D1-A2G5-01A	-1612.37	-756.088	-2368.46	0.967074
TCGA-D1-A2G6-01A	-84.5664	16.0801	-68.4863	0.828185
TCGA-D1-A2G7-01A	-1010.83	-703.288	-1714.12	0.93821
TCGA-D1-A3DA-01A	-1148.65	-100.006	-1248.66	0.912395
TCGA-D1-A3DG-01A	-1520.05	-895.394	-2415.44	0.968806
TCGA-D1-A3DH-01A	-1537.94	-913.497	-2451.43	0.970102
TCGA-D1-A3JP-01A	-482.957	1128.41	645.454	0.765015
TCGA-D1-A3JQ-01A	-694.261	143.506	-550.755	0.865753
TCGA-DF-A2KN-01A	-332.512	1516.13	1183.61	0.711808
TCGA-DF-A2KR-01A	-1530.6	441.724	-1088.87	0.902545
TCGA-DF-A2KS-01A	-1131.85	674.947	-456.899	0.858776
TCGA-DF-A2KU-01A	-516.121	1824.93	1308.81	0.69878
TCGA-DF-A2KV-01A	-1115.46	999.359	-116.097	0.832082
TCGA-DF-A2KY-01A	-774.169	1066.35	292.178	0.797368
TCGA-DF-A2KZ-01A	-194.673	771.257	576.584	0.771486
TCGA-DF-A2L0-01A	-581.111	938.964	357.853	0.791513
TCGA-DI-A0WH-01A	-1285.44	-110.654	-1396.09	0.921039
TCGA-DI-A1BU-01A	-868.879	138.158	-730.72	0.878671
TCGA-DI-A1BY-01A	-138.363	939.974	801.611	0.750053
TCGA-DI-A1NN-01A	-523.879	1129.96	606.078	0.768724
TCGA-DI-A1NO-01A	-1670.7	-937.408	-2608.11	0.975427
TCGA-DI-A2QT-01A	-1247.45	-303.973	-1551.43	0.929679
TCGA-DI-A2QU-01A	-1054.16	-304.908	-1359.07	0.918908
TCGA-DI-A2QY-01A	-1137.72	-706.658	-1844.38	0.944655
TCGA-E6-A1LX-01A	-1483.89	-509.523	-1993.41	0.951606
TCGA-E6-A1LZ-01A	-1494.21	367.656	-1126.55	0.904912
TCGA-E6-A1M0-01A	-825.675	52.3198	-773.355	0.881641
TCGA-E6-A2P8-01A	-213.446	1096.05	882.608	0.742137
TCGA-E6-A2P9-01A	-1481	187.477	-1293.52	0.915071
TCGA-E6-A8L9-01A	-172.603	584.395	411.792	0.786649
TCGA-EC-A1NJ-01A	-64.2472	1198.23	1133.98	0.716906
TCGA-EC-A1QX-01A	-327.261	1043.47	716.212	0.758284
TCGA-EC-A24G-01A	-95.1336	605.89	510.756	0.777598
TCGA-EO-A1Y5-01A	-574.623	1112.71	538.09	0.775069
TCGA-EO-A1Y7-01A	-1648.61	-11.2804	-1659.89	0.935426
TCGA-EO-A1Y8-01A	-1159.01	-473.219	-1632.23	0.933983
TCGA-EO-A22R-01A	-820.411	-66.0565	-886.468	0.889355
TCGA-EO-A22S-01A	-1443.64	-871.238	-2314.88	0.965043
TCGA-EO-A22T-01A	-438.515	595.157	156.642	0.809216
TCGA-EO-A22U-01A	-1347.32	-414.851	-1762.17	0.940628
TCGA-EO-A22X-01A	-161.262	432.477	271.215	0.799221
TCGA-EO-A22Y-01A	-835.267	-462.481	-1297.75	0.915321
TCGA-EO-A2CG-01A	-405.518	-491.434	-896.952	0.890058
TCGA-EO-A2CH-01A	-1656.47	-233.741	-1890.21	0.946841
TCGA-EO-A3AS-01A	-579.805	98.8932	-480.912	0.860577
TCGA-EO-A3AU-01A	-645.949	532.256	-113.693	0.831886
TCGA-EO-A3AV-01A	-498.832	1772.26	1273.42	0.702487
TCGA-EO-A3AY-01A	-683.001	1128.51	445.505	0.783584
TCGA-EO-A3AZ-01A	14.3039	2094.7	2109.01	0.610135
TCGA-EO-A3B0-01A	-306.795	357.171	50.376	0.818281
TCGA-EO-A3B1-01A	-275.056	1041.39	766.334	0.753468
TCGA-EO-A3KU-01A	-1323.46	-285.598	-1609.06	0.932762
TCGA-EO-A3KW-01A	-983.718	664.893	-318.825	0.848217
TCGA-EO-A3KX-01A	-1476.57	-707.088	-2183.66	0.959816
TCGA-EO-A3L0-01A	-771.472	-422.131	-1193.6	0.909057
TCGA-EY-A1G7-01A	-1279.4	-725.377	-2004.78	0.952117
TCGA-EY-A1G8-01A	-1529.78	-777.378	-2307.16	0.964745
TCGA-EY-A1GC-01A	-869.005	1438.72	569.716	0.772127
TCGA-EY-A1GD-01A	-1217.37	-235.748	-1453.12	0.924267
TCGA-EY-A1GE-01A	-620.074	652.959	32.8847	0.819754
TCGA-EY-A1GF-01A	-987.432	-83.4513	-1070.88	0.901404
TCGA-EY-A1GH-01A	-1065.52	77.0592	-988.463	0.8961
TCGA-EY-A1GI-01A	-693.139	13.8567	-679.282	0.875041
TCGA-EY-A1GK-01A	-605.9	900.241	294.341	0.797176
TCGA-EY-A1GL-01A	-730.843	-365.98	-1096.82	0.903047
TCGA-EY-A1GM-01A	-1480.41	-1103.26	-2583.66	0.97463
TCGA-EY-A1GO-01A	-1619.16	-987.215	-2606.38	0.975371
TCGA-EY-A1GP-01A	-310.707	193.041	-117.666	0.83221
TCGA-EY-A1GQ-01A	-334.751	-219.778	-554.529	0.86603
TCGA-EY-A1GR-01A	-519.003	705.775	186.772	0.806609
TCGA-EY-A1GS-01A	-1532.14	86.4438	-1445.69	0.92385
TCGA-EY-A1GT-01A	-468.87	-325.504	-794.374	0.883093
TCGA-EY-A1GU-01A	-1278.83	78.4445	-1200.38	0.909472
TCGA-EY-A1GV-01A	-766.599	563.183	-203.416	0.839123
TCGA-EY-A1GW-01A	-1247.2	-202.847	-1450.05	0.924095
TCGA-EY-A1GX-01A	-1955.07	-1252.4	-3207.46	0.991013
TCGA-EY-A1H0-01A	-1773.07	-739.143	-2512.21	0.972229
TCGA-EY-A210-01A	-832.188	1321.93	489.745	0.779533
TCGA-EY-A212-01A	-1302.55	-561.911	-1864.46	0.945618
TCGA-EY-A214-01A	-539.11	856.888	317.778	0.795094
TCGA-EY-A215-01A	-1778.73	198.482	-1580.25	0.931229
TCGA-EY-A2OM-01A	-376.726	-70.5502	-447.276	0.858052
TCGA-EY-A2ON-01A	-989.353	276.759	-712.594	0.877397
TCGA-EY-A2OO-01A	-1162.86	-661.176	-1824.04	0.943672
TCGA-EY-A2OP-01A	-1635.3	-539.2	-2174.5	0.959437
TCGA-EY-A2OQ-01A	-830.272	-162.816	-993.088	0.896401
TCGA-EY-A3L3-01A	-1680.39	-1029.94	-2710.33	0.978623
TCGA-EY-A3QX-01A	-1145.43	258.019	-887.413	0.889418
TCGA-EY-A4KR-01A	-348.483	1379.43	1030.95	0.727368
TCGA-EY-A547-01A	-1636.75	-517.699	-2154.45	0.958604
TCGA-EY-A548-01A	-748.696	412.692	-336.004	0.849549
TCGA-EY-A549-01A	-1352.33	17.9885	-1334.34	0.917471
TCGA-EY-A54A-01A	-390.135	764.337	374.202	0.790044
TCGA-EY-A5W2-01A	-781.855	485.742	-296.114	0.846446
TCGA-EY-A72D-01A	-1051	-735.781	-1786.78	0.941848
TCGA-FI-A2CX-01A	371.677	3603.7	3975.38	0.373027
TCGA-FI-A2CY-01A	-684.003	1435.14	751.136	0.754932
TCGA-FI-A2D0-01A	-869.432	-102.815	-972.247	0.895041
TCGA-FI-A2D2-01A	-667.916	-69.263	-737.179	0.879123
TCGA-FI-A2D4-01A	-860.702	-549.618	-1410.32	0.92185
TCGA-FI-A2D5-01A	-433.51	37.028	-396.482	0.854199
TCGA-FI-A2D6-01A	-868.959	829.888	-39.0712	0.825758
TCGA-FI-A2EU-01A	-1901.57	-941.679	-2843.25	0.982449
TCGA-FI-A2EW-01A	-1278.47	-150.542	-1429.01	0.92291
TCGA-FI-A2EX-01A	-1287.24	-93.0967	-1380.34	0.920136
TCGA-FI-A2EY-01A	-1398.31	-693.504	-2091.82	0.955945
TCGA-FI-A2F4-01A	-971.874	939.154	-32.7192	0.825231
TCGA-FI-A2F8-01A	-648.061	40.6029	-607.458	0.869889
TCGA-FI-A2F9-01A	-666.271	-1238.57	-1904.84	0.94753
TCGA-FI-A3PV-01A	-1501.55	-921.312	-2422.87	0.969076
TCGA-FI-A3PX-01A	-1431.66	-769.337	-2201	0.960527
TCGA-H5-A2HR-01A	-1028.46	590.703	-437.76	0.857334
TCGA-JU-AAVI-01A	-703.421	1462.78	759.356	0.754141
TCGA-K6-A3WQ-01A	-955.679	-371.005	-1326.68	0.917023
TCGA-KJ-A3U4-01A	-1177.91	695.95	-481.956	0.860655
TCGA-KP-A3VZ-01A	-1630.93	-997.833	-2628.76	0.97609
TCGA-KP-A3W0-01A	-509.526	790.268	280.741	0.79838
TCGA-KP-A3W1-01A	-29.7755	1940.55	1910.78	0.632928
TCGA-KP-A3W3-01A	-465.008	732.484	267.476	0.799551
TCGA-KP-A3W4-01A	-137.784	147.102	9.31857	0.821731
TCGA-PG-A5BC-01A	-541.899	-726.041	-1267.94	0.91355
TCGA-PG-A6IB-01A	-325.594	1835.45	1509.86	0.677369
TCGA-PG-A7D5-01A	-997.641	-633.273	-1630.91	0.933914
TCGA-PG-A914-01A	-1129.68	354.851	-774.833	0.881744
TCGA-PG-A915-01A	-1409.29	-700.43	-2109.72	0.956713
TCGA-PG-A916-01A	-1068.29	30.2736	-1038.01	0.899305
TCGA-PG-A917-01A	-737.602	1040.15	302.543	0.796449
TCGA-QF-A5YS-01A	-1461.39	380.308	-1081.08	0.902052
TCGA-QF-A5YT-01A	-974.655	-425.885	-1400.54	0.921293
TCGA-QS-A5YQ-01A	-803.583	955.801	152.217	0.809597
TCGA-QS-A5YR-01A	-438.086	1126.98	688.892	0.760893
TCGA-QS-A744-01A	-938.695	-1358.9	-2297.6	0.964375
TCGA-QS-A8F1-01A	-734.989	-111.062	-846.05	0.886627
TCGA-SJ-A6ZI-01A	-585.98	1492.78	906.804	0.739751
TCGA-SJ-A6ZJ-01A	-716.834	9.85175	-706.982	0.877002
TCGA-SL-A6J9-01A	-814.878	1874.96	1060.08	0.724426
TCGA-SL-A6JA-01A	-1829.65	-711.649	-2541.29	0.973219
